# Supplementary material
Source: HighWire-hosted journal article supplement (https://bmjopen.bmj.com/content/9/5/e028694)
Supplement: inline-supplementary-material-1 [file inline-supplementary-material-1.pdf]

You recently agreed to review the following study: **Manuscript Title** for *Journal Name* (manuscript # XXXXXXXX).

You may find the following information helpful as you perform your review. The trial was registered with **Registry Name (Registration Number)** on **Date of Registration**, {prior to, after} the start of enrollment.

At the time enrollment began the primary outcome measure was:

**Primary study outcome from registry site or Unregistered**

As a reminder, the World Health Organization (WHO) defines a clinical trial as any research study that prospectively assigns human participants or groups of humans to one or more health-related interventions to evaluate the effects on health outcomes; you are receiving this information because the study under review meets this definition.

The WHO and International Committee of Medical Journal Editors mandate that all clinical trials be registered prior to the start of enrollment, and that all primary and secondary outcome measures should be clearly defined before participant enrollment begins.
